# Supplementary material for: Comparative analysis of differentially expressed miRNAs related to uterine involution in the ovine ovary and uterus
Source: Copernicus journal article supplement (doi:10.5194/aab-64-167-2021), 2021-05-12
Supplement: Supplementary file [file aab-64-167-2021-supplement.pdf]

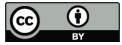

*Supplement of*

## **Comparative analysis of differentially expressed miRNAs related to uterine involution in the ovine ovary and uterus**

**Heng Yang et al.**

*Correspondence to:* Heng Yang (yh20183007@swu.edu.cn) and Gaofu Wang (29414467@qq.com)

The copyright of individual parts of the supplement might differ from the article licence.

Table S1A the primer sequence of miRNA (ovary)

|         | miR_name             | Primer                      |
|---------|----------------------|-----------------------------|
| UFO/USO | oar-miR-362          | GCAATCCTTGGAACCTAGGTGTGAGT  |
|         | oar-miR-200a         | GGGGTAACACTGTCTGGTAACGATGTT |
|         | oar-miR-200c         | GGTAATACTGCCGGGTAATGATGGA   |
|         | oar-miR-200b         | GGGGTAATACTGCCTGGTAATGATG   |
|         | oar-novel-miR-719-5p | CGGCGGGGGCGGTCC             |
|         | oar-novel-miR-296-5p | GTCCTTCATTCCACCGGAGTCTG     |
|         | U6                   | CAAGGATGACACGCAAATTCG       |

Table S1B the primer sequence of miRNA (uterus)

|         | miR_name              | Primer                        |
|---------|-----------------------|-------------------------------|
| UFU/USU | oar-miR-200a          | GGGGTAACACTGTCTGGTAACGATGTT   |
|         | oar-miR-99a           | CCGAACCCGTAGATCCGATCTTG       |
|         | oar-miR-133           | TCCGTTTTGGTCCCCTTCAAC         |
|         | oar-miR-379-5p        | CGTGGTAGACTATGGAACGTAGGC      |
|         | oar-novel-miR-1185-3p | CCCGGCCTGGAATGTAAAGAAGTATGTAT |
|         | oar-novel-miR-1109-5p | GGCCCGTCCCGTGCCTCAA           |
|         | U6                    | CAAGGATGACACGCAAATTCG         |

Table S1C the primer sequence of target genes

|       | Gene      | Primer (5'-3')             | Product size (bp) |
|-------|-----------|----------------------------|-------------------|
|       | ZEB1      | F: TGGTGCTGGTACTGATGCTGAT  | 287               |
|       |           | R: CCCACTGGTCTTTACCCAATAGA |                   |
| UF/US | YAP1      | F: GACAGCGGACTGAGCATGAG    | 108               |
|       |           | R: CAGGGTGCTTTGGTTGATAGTG  |                   |
|       | β-catenin | F: GGGAGTCCGCATGGAAGAAA    | 122               |
|       |           | R: GCAGCTGCACAAACAATGGA    |                   |
